# Supplementary material for: Comprehensive properties study of low-temperature imidized polyimide with curing accelerators
Source: Royal Society of Chemistry journal article supplement (doi:10.1039/d0tc03770b), 2020-01-01
Supplement: d0tc03770b1.pdf [file d0tc03770b1.pdf]

# Supporting materials for

  

## Comprehensive properties study of low-temperature imidized polyimide with curing accelerators

*Chao Huang, Jinhui Li, Deliang Sun, Rui Xuan, Yuying Sui, Tingyu Li, Liang Shang, Guoping Zhang, Rong Sun and Ching-Ping Wong*

C. Huang, Dr. J. Li, Dr. D. Sun, R. Xuan, Y. Sui, T. Li, B. Dr.L. Shan, Zhang, Prof. G. Zhang, Prof. R. Sun, Prof. C.-P. Wong  
Shenzhen Institute of Advanced Electronic Materials, Shenzhen Institutes of Advanced Technology, Chinese Academy of Sciences, Shenzhen 518055, China

C. Huang,  
Department of Nano Science and Technology Institute, University of Science and Technology of China, Suzhou 215123, China.

T. Li  
Peking University Shenzhen Graduate School, Shenzhen 518055, China

Prof. C.-P. Wong  
School of Materials Science and Engineering, Georgia Institute of Technology, Atlanta, GA 30332, United States.

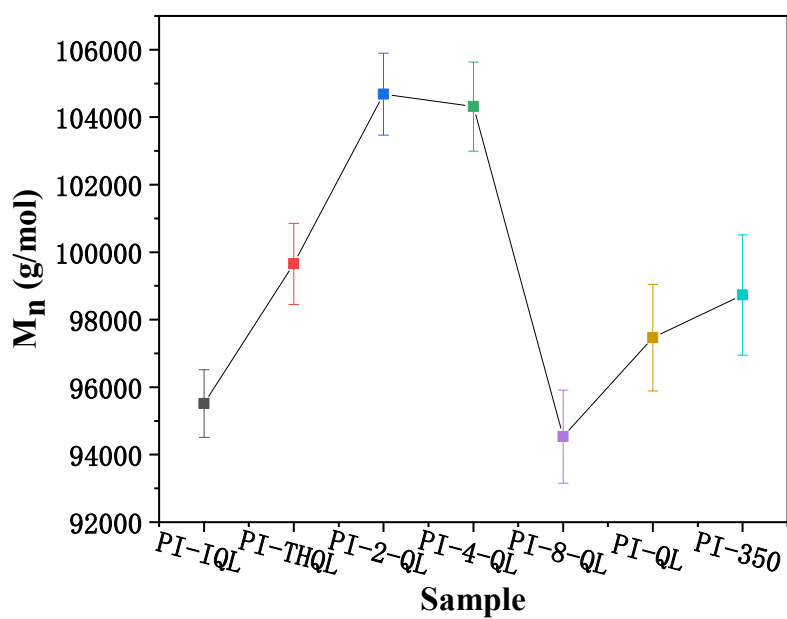

Figure S1. The number average molecular weight ( $M_n$ ) of different low temperature curing accelerators.

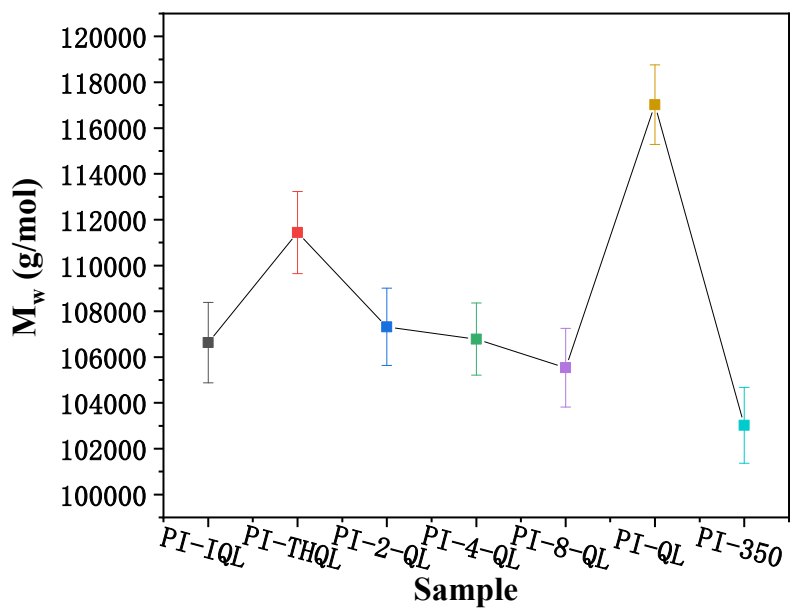

Figure S2. The weight average molecular weight ( $M_w$ ) of different low temperature curing accelerators.

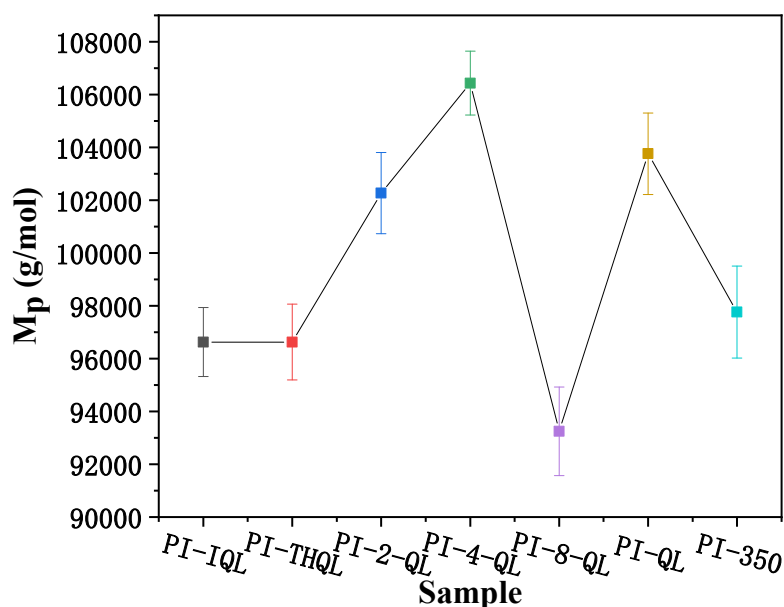

Figure S3. Peak molecular weight ( $M_p$ ) of different low temperature curing accelerators.

Table S1. Average molecular weight and polydispersity index of PAA synthesized with different low temperature curing accelerators.

| Sample  | $M_n$ (g/mol) | $M_w$ (g/mol) | $M_p$ (g/mol) | $(M_w / M_n)$ |
|---------|---------------|---------------|---------------|---------------|
| PI-IQL  | 95514         | 106629        | 96629         | 1.116373      |
| PI-THQL | 99653         | 111438        | 96629         | 1.118265      |
| PI-2-QL | 104685        | 107320        | 102268        | 1.025174      |
| PI-4-QL | 104315        | 106785        | 106434        | 1.023673      |
| PI-8-QL | 94536         | 105536        | 93243         | 1.116352      |
| PI-QL   | 97463         | 117019        | 103762        | 1.510650      |
| PI-350  | 98733         | 103019        | 97762         | 1.310650      |

The molecular weight will significantly affect the mechanical properties of the prepared polymer, so we use GPC test to determine the average molecular weight of the synthesized polyamide acid at different low temperature curing accelerators, as shown in Table S1. The number average molecular weight ( $M_n$ ) of different low temperature curing accelerators were 95514 g/mol, 99653 g/mol, 104685 g/mol, 104315 g/mol, 94536 g/mol, 97463 g/mol and 98733 g/mol respectively. The weight average molecular weight ( $M_w$ ) of different low temperature curing accelerators were 106629 g/mol, 111438 g/mol, 107320 g/mol, 106785 g/mol, 105536 g/mol, 117019 g/mol and 103019 g/mol respectively. The molecular weight of the highest concentration is called peak molecular weight ( $M_p$ ), which is 96629 g/mol, 96629 g/mol, 102268 g/mol, 106434 g/mol, 93243 g/mol, 103762 g/mol and 97762 g/mol under different low temperature curing accelerators. The polydispersity index ( $M_w / M_n$ ) of the polymer indicates the width of the molecular weight distribution. The polydispersity indexes of different low temperature curing accelerators are 1.116, 1.118, 1.025, 1.024, 1.116, 1.511 and 1.311, respectively, indicating that the polydispersity of the molecular weight has similar. The experimental data show that the molecular weight of polyimides

catalyzed by different low temperature curing agents has little difference.

Table S2. IR band allocation and assignments of the precursor and the according polyimide.

| Wavenumber [cm <sup>-1</sup> ]        |           | Band assignment                                    |
|---------------------------------------|-----------|----------------------------------------------------|
| Precursor                             | Polyimide |                                                    |
| -                                     | 1776      | Imide I $\nu(\text{C}=\text{O})$                   |
| 1660                                  | -         | Amide I $\nu(\text{C}=\text{O})$                   |
| 1545                                  | -         | Amide II $\nu(\text{C}-\text{N}-\text{H})$         |
| 1500                                  | 1500      | $\nu(\text{C}_6\text{H}_4)$ aromatic ring          |
| -                                     | 1378      | Imide II $\nu(\text{C}-\text{N}-\text{C})$ , axial |
| 1109                                  |           | $\nu(\text{Si}-\text{O}-\text{Si})$ asymmetric     |
| 2950                                  |           | $\nu(\text{C}-\text{H})$ aliphatic                 |
| Vibration modes: $\nu$ ... stretching |           |                                                    |

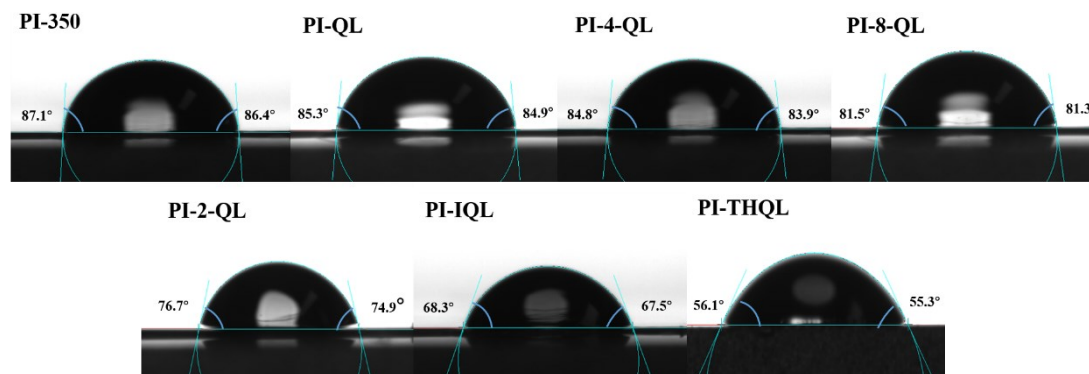

Figure S4. Contact angle of water and polyimide with different accelerators.
